# Supplementary material for: CD34T+ Humanized Mouse Model to Study Mucosal HIV-1 Transmission and Prevention
Source: PubMed Central journal article supplement (PMC7997265; doi:10.3390/vaccines9030198), 2021-02-27
Supplement: vaccines-09-00198-s001.pdf [file vaccines-09-00198-s001.pdf]

## Supplementary figures and tables

### CD34T+ humanized mouse model to study mucosal HIV-1 transmission and prevention

#### Supplementary Figures

- Supplementary Fig. 1 *Comparison of leukocyte populations in the blood of CD34 and CD34T+ mice*
- Supplementary Fig. 2 *Non-humanized mice are not suitable for generating T+ mice*
- Supplementary Fig. 3 *Comparison of leukocyte populations in the tissue of CD34 and CD34T+ mice*
- Supplementary Fig. 4 *Sub-optimal mucosal HIV-1 infection in CD34 mice*
- Supplementary Fig. 5 *Neutralization potency of bNAb tri-mix against NL4-3YU2 HIV-1*

#### Tables

- Supplementary Table 1 *Leukocyte cell numbers in the blood of CD34T+ mice*
- Supplementary Table 2 *Leukocyte cell numbers in the blood of CD34 mice*
- Supplementary Table 3 *Leukocyte cell numbers in tissue of CD34T+ and CD34 mice*

# Supplementary Figure 1

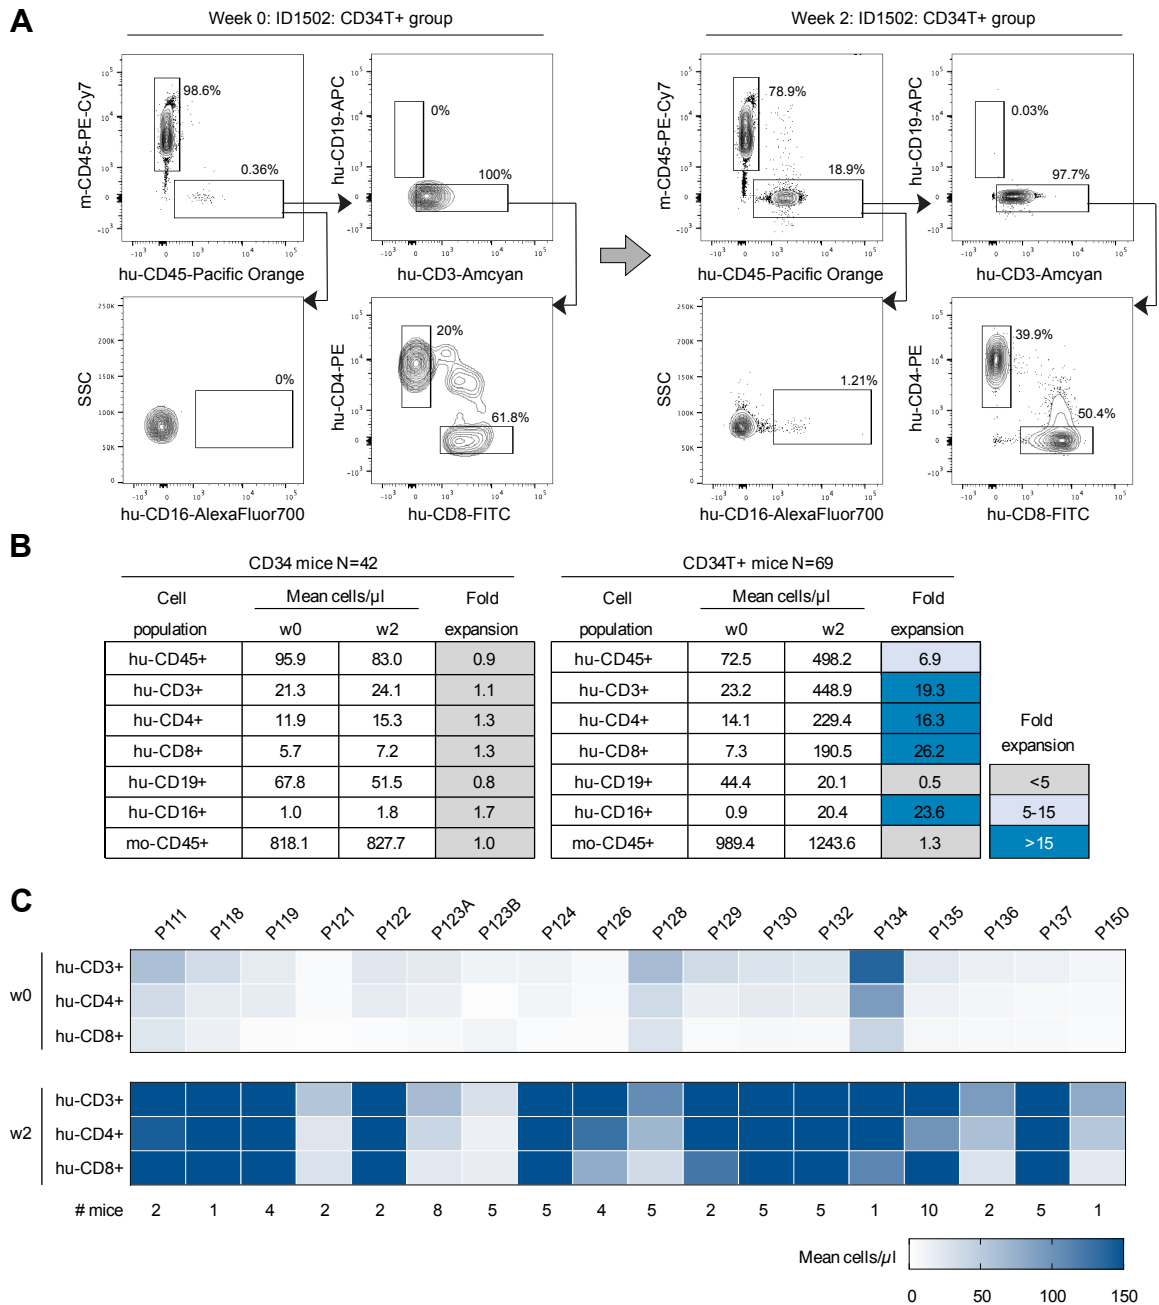

**Supplementary Figure 1: Comparison of leukocyte populations in the blood of CD34 and CD34T+ mice. A,** Gating strategy depicted with representative FACS plots from analysis of blood from a CD34T+ mouse ID1502 before (week 0) and after (week 2) UCBC and human IL-7 treatment. **B,** Mean cell numbers per  $\mu$ l blood and fold change between week 0 (w0) and week 2 (w2) from CD34 and CD34T+ mice shown in Fig. 1b. **C,** Analysis of human leukocyte expansion based on mean cell numbers per  $\mu$ l blood in CD34T+ mice (N=69) divided according to the cord blood donor.

## Supplementary Figure 2

**A**

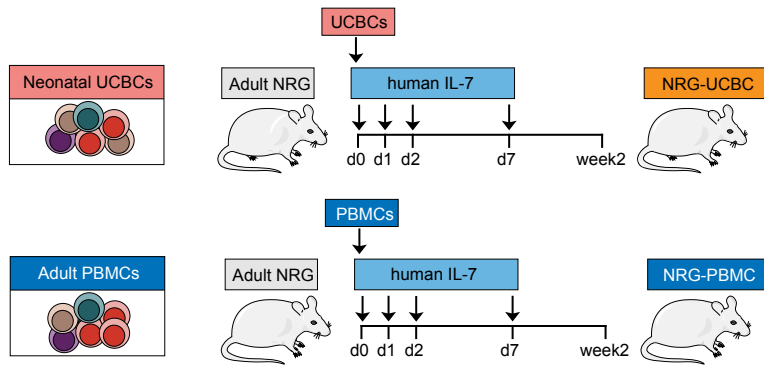

**B**

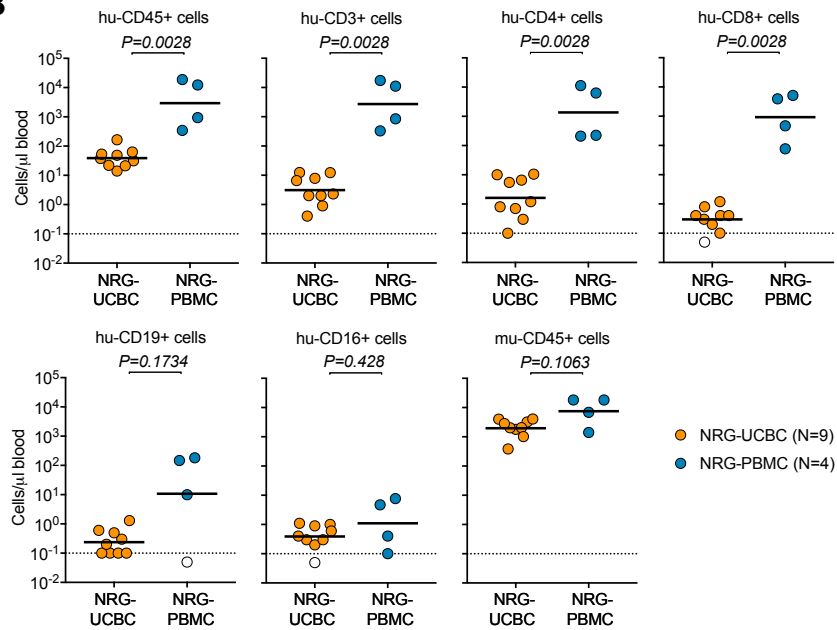

**S2 Fig: Non-humanized mice are not suitable for generating T+ mice**  
**A**, Schematic illustration depicting the generation of NRG-UCBC and NRG-PBMC mice. Non-humanized adult NRG mice were used for injection of either UCBCs or PBMCs along with human-IL-7. NRG-UCBC mice showed low human cell engraftment rates and NRG-PBMC mice developed rapid GvHD. **B**, FACS analysis of leukocyte populations in the blood of NRG-UCBC and NRG-PBMC mice, 2 weeks after injection of cells and IL7. Points shown in white were below limit of detection of assay. Statistical analysis done using unpaired Mann-Whitney test.

## Supplementary Figure 3

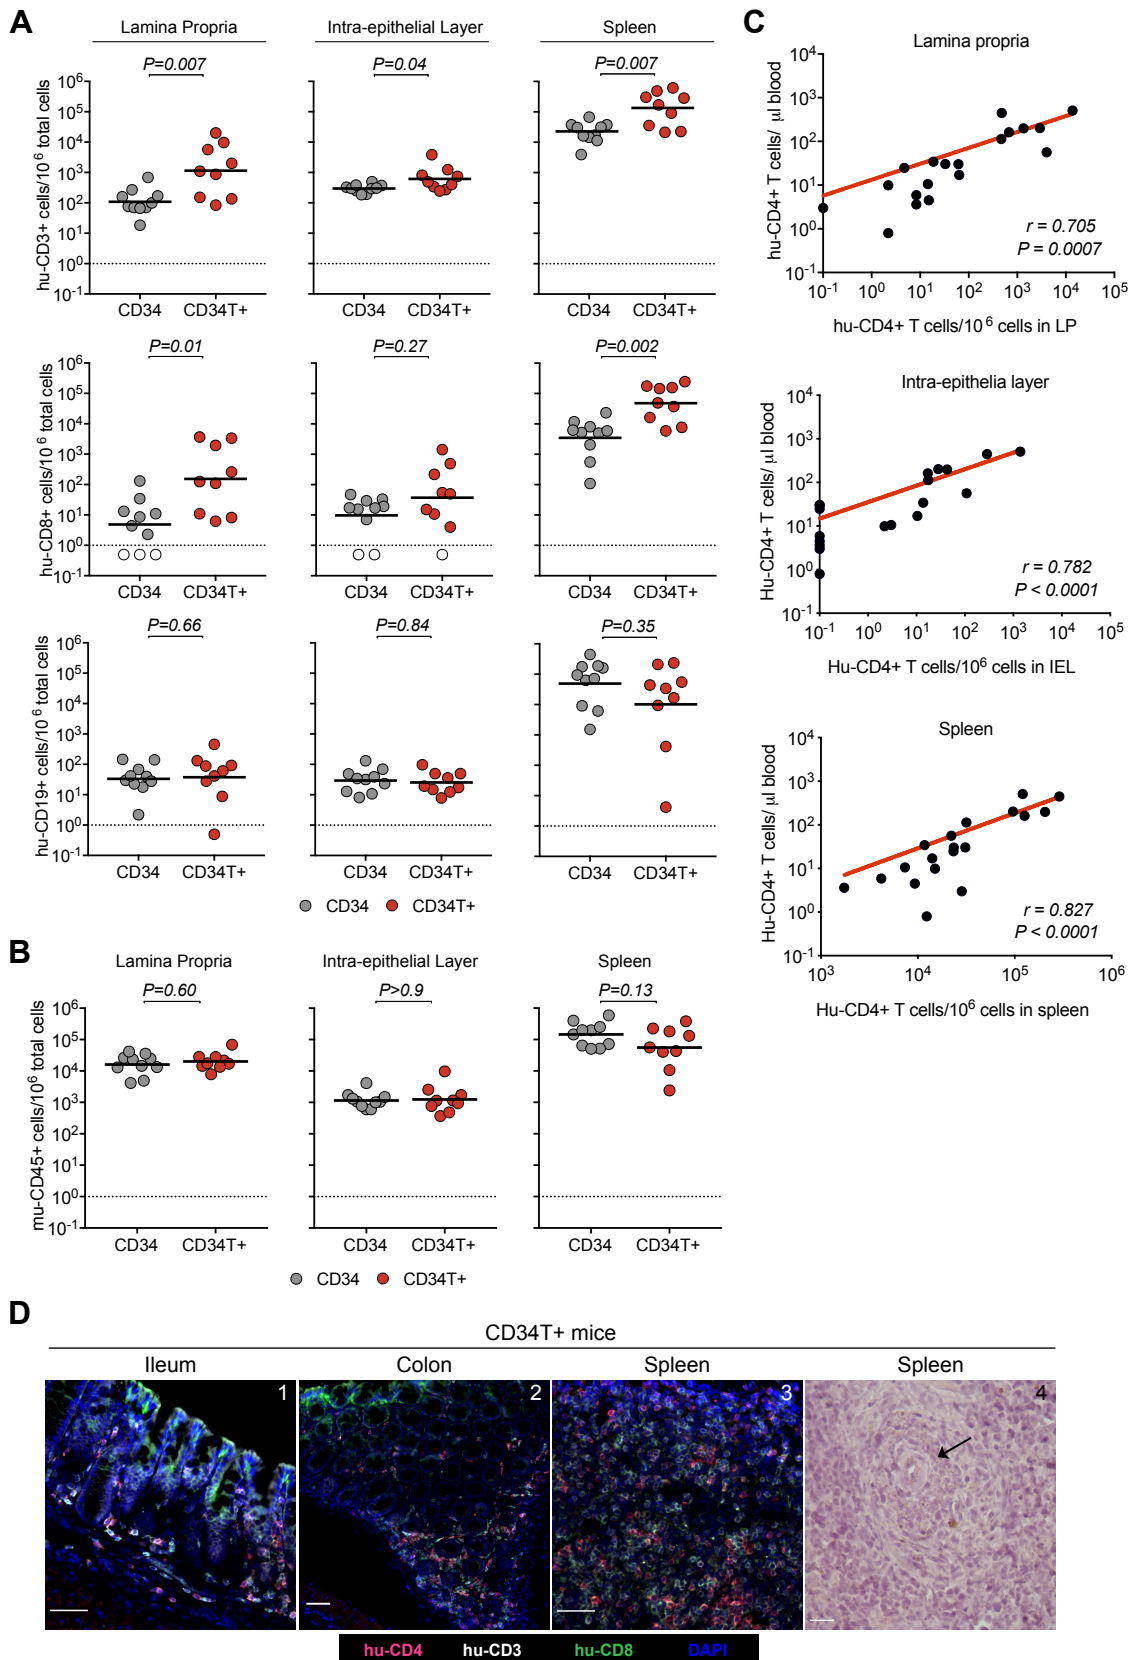

### S3 Fig: Comparison of leukocyte populations in the tissue of CD34 and CD34T+ mice

FACS analysis of CD34 and CD34T+ mice shown in Fig. 2c for the presence of human CD3+ T cell, human CD8+ T cells, human CD19+ B cells (A) and mouse CD45+ cells (B) in the gut LP, IEL and the spleen at week 2. Points shown in white were below limit of detection of assay. Statistical analysis done using a Mann-Whitney U test. C, Combined Pearson correlation curves plotted for CD34 (N=10) and CD34T+(N=9) mice to analyze the relationship between human CD4+T cell levels in the blood vs. lymphoid tissue (LP, IEL and spleen). A,B Bars depict geometric means. A,B,C Dots represent individual mice. D, Image 1-3: IF staining of human T cells in the ileum, colon and spleen of HIV-1 infected CD34T+ mouse. Human CD3+ (white), CD4+ (red), CD8+ (green) cells were labeled for detection along with DAPI for visualizing the nucleus. Scale bar is 50  $\mu$ m. Image 4: Section of splenic tissue from a CD34T+ mouse stained with Haematoxylin and Eosin demonstrating the presence of a PALS-like structure (arrow). 3 mice per group and 3 tissue sections from different areas of each mouse tissue were analyzed. Representative images were selected for display.

## Supplementary Figure 4

**A**

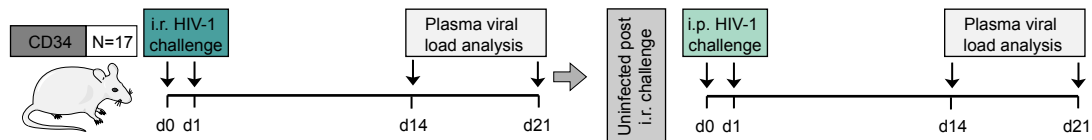

**B**

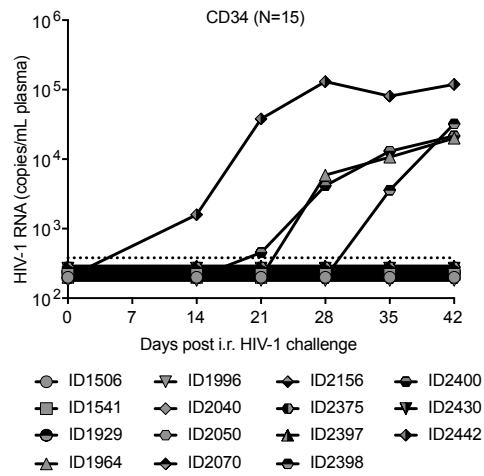

**C**

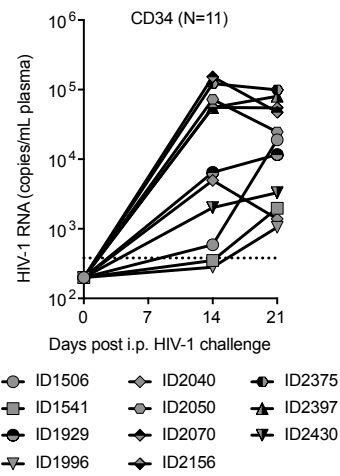

**D**

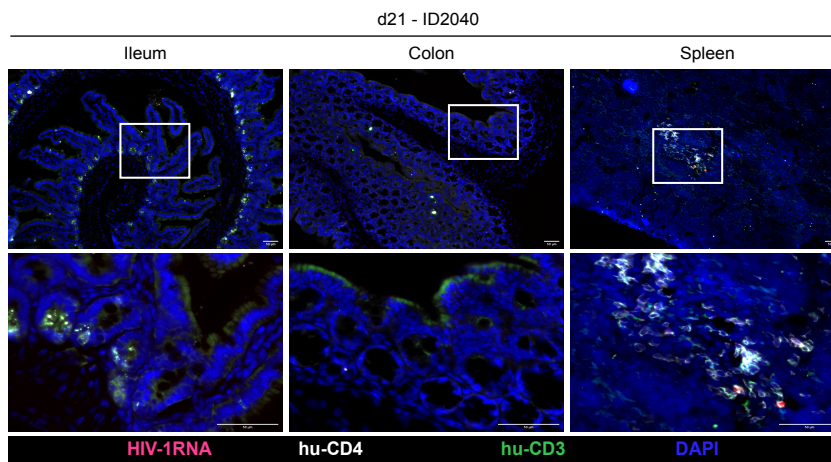

### S4 Fig: Sub-optimal mucosal HIV-1 transmission in CD34 mice

**A**, Schematic representation of the experiment design. CD34 mice were given i.r. challenges with NL4-3<sub>YU2</sub> HIV-1 on consecutive days and bled at the indicated time points for testing viremia. Mice that remained uninfected after i.r. challenge were challenged via i.p. injection of NL4-3<sub>YU2</sub> HIV-1 to confirm susceptibility to infection. **B**, Plasma HIV-1 RNA levels in the blood of CD34 mice after i.r. challenge with high dose NL4-3<sub>YU2</sub> HIV-1. **C**, Plasma HIV-1 RNA levels in CD34 mice after i.p. challenge with NL4-3<sub>YU2</sub> HIV-1. The dotted line represents the detection limit of 384 HIV-1 RNA copies/ml of the assay in (b) and (c). **D**, RNA-scope-based detection of HIV-1 infection in the ileum, colon and spleen of CD34+ mice harvested at day 21 post i.p. HIV-1 challenge. HIV-1 RNA (pink), CD4+ cells (white), CD3+ cells (green) were labeled by in-situ hybridization and IF and nuclei were stained with DAPI. Scale bar is 50  $\mu$ m. 3 mice per group and 3 tissue sections per mouse were analyzed. Representative images were selected for display. i.r. intra-rectal, i.p. intra-peritoneal

## Supplementary Figure 5

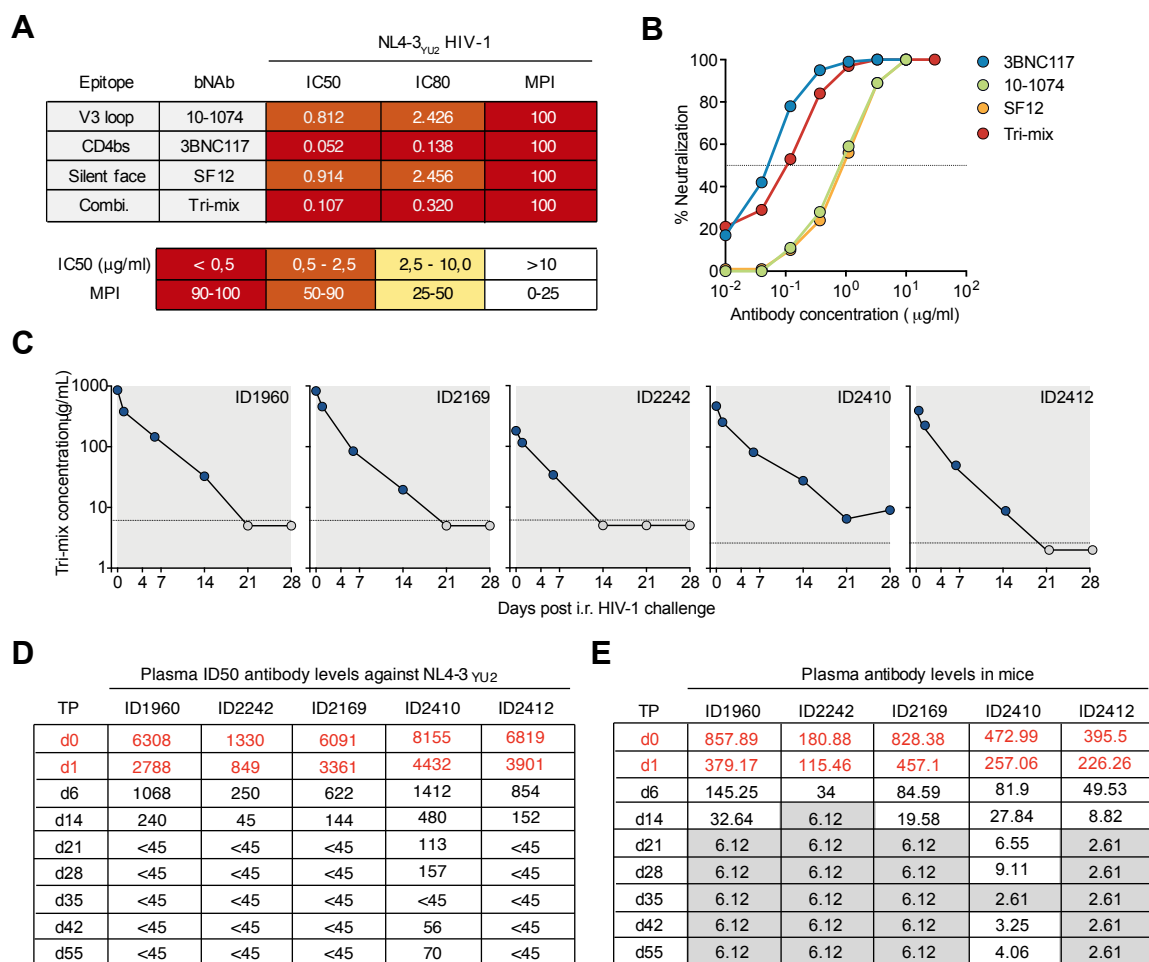

### S5 Fig: Neutralization potency of bNAb tri-mix against NL4-3<sub>YU2</sub> HIV-1

**A**, Neutralization potency of individual bNAbs (3BNC117, 10-1074 and SF12) or an equimolar tri-mix (combi.) against the NL4-3<sub>YU2</sub> HIV-1 infectious molecular clone represented as 50% inhibitory concentration (IC50) or 80% inhibitory concentration (IC80) along with the maximum percent inhibition (MPI) values. **B**, Neutralization curve of the individual bNAbs along with the tri-mix measured in (a). **C**, Antibody concentration of the tri-mix in the plasma of CD34T+ tri-mix mice from Fig. 3 measured using the TZM-bl assay. **D**, 50% Inhibitory dilution (ID50) values of the tri-mix in the plasma of CD34T+ tri-mix mice from Fig. 3 measured against the NL4-3<sub>YU2</sub> HIV-1 infectious molecular clone. ID50 values at the time of i.r. HIV-1 challenge (d0 and d1) are highlighted in red. **E**, Tri-mix concentration in the plasma of CD34T+ tri-mix mice from Fig. 3 measured against the NL4-3<sub>YU2</sub> HIV-1 infectious molecular clone. Values at the time of i.r. HIV-1 challenge (d0 and d1) are highlighted in red and values below the detection limit of the assay are highlighted in grey.

Supplementary Table 1. Leukocyte cell numbers in the blood of CD34T+ mice

| Mouse ID | CD34T+ mice N=69 |        |         |        |         |        |         |        |          |       |          |       |         |        | Number of cells/ $\mu$ l blood volume |        |      |
|----------|------------------|--------|---------|--------|---------|--------|---------|--------|----------|-------|----------|-------|---------|--------|---------------------------------------|--------|------|
|          | hu-CD45+         |        | hu-CD3+ |        | hu-CD4+ |        | hu-CD8+ |        | hu-CD19+ |       | hu-CD16+ |       | m-CD45+ |        | <10                                   | 10-100 | >100 |
|          | w0               | w2     | w0      | w2     | w0      | w2     | w0      | w2     | w0       | w2    | w0       | w2    | w0      | w2     |                                       |        |      |
| 1317     | 13,2             | 977,9  | 4,9     | 927,1  | 4,0     | 446,3  | 0,8     | 439,1  | 6,3      | 0,7   | nd       | nd    | 846,6   | 801,9  |                                       |        |      |
| 1320     | 41,3             | 1019,3 | 38,1    | 977,6  | 31,7    | 507,3  | 3,3     | 417,7  | 1,0      | 0,7   | nd       | nd    | 876,3   | 3291,4 |                                       |        |      |
| 1344     | 373,2            | 542,3  | 32,1    | 472,4  | 18,0    | 198,2  | 12,7    | 204,5  | 323,6    | 11,0  | nd       | nd    | 793,1   | 45,1   |                                       |        |      |
| 1550     | 98,1             | 632,7  | 54,8    | 615,6  | 32,7    | 202,0  | 19,1    | 354,6  | 38,4     | 9,2   | nd       | nd    | 719,4   | 201,3  |                                       |        |      |
| 1571     | 4,0              | 229,4  | 3,8     | 225,7  | 2,9     | 162,1  | 0,4     | 54,2   | 0,1      | 0,5   | nd       | nd    | 652,6   | 981,2  |                                       |        |      |
| 1618     | 0,9              | 22,2   | 0,7     | 21,5   | 0,1     | 9,9    | 0,5     | 8,8    | 0,0      | 0,1   | nd       | nd    | 673,3   | 911,8  |                                       |        |      |
| 1800     | 65,7             | 181,0  | 23,1    | 170,5  | 9,7     | 56,1   | 3,8     | 88,8   | 33,2     | 5,4   | nd       | nd    | 524,1   | 24,0   |                                       |        |      |
| 1551     | 78,5             | 260,0  | 62,9    | 256,2  | 31,9    | 79,8   | 27,1    | 156,8  | 10,6     | 1,7   | nd       | nd    | 538,6   | 219,3  |                                       |        |      |
| 1578     | 5,7              | 87,0   | 4,7     | 85,2   | 1,2     | 33,7   | 2,7     | 44,1   | 0,3      | 0,3   | nd       | nd    | 1874,5  | 1078,5 |                                       |        |      |
| 1614     | 32,2             | 140,4  | 31,9    | 139,1  | 26,3    | 87,9   | 4,2     | 45,4   | 0,0      | 0,0   | nd       | nd    | 1329,2  | 2288,0 |                                       |        |      |
| 1782     | 46,0             | 490,5  | 44,2    | 486,2  | 18,1    | 244,5  | 3,5     | 155,7  | 0,7      | 0,2   | nd       | nd    | 842,1   | 1930,3 |                                       |        |      |
| 1502     | 3,8              | 348,7  | 3,8     | 340,5  | 2,4     | 171,5  | 0,8     | 136,0  | 0,0      | 0,1   | 0,0      | 4,2   | 1052,2  | 1454,1 |                                       |        |      |
| 1508     | 63,8             | 141,0  | 63,2    | 139,7  | 59,4    | 100,0  | 2,9     | 32,7   | 0,0      | 0,1   | 0,1      | 1,2   | 1550,3  | 1322,3 |                                       |        |      |
| 1529     | 2,9              | 135,8  | 2,8     | 131,6  | 0,6     | 43,1   | 1,9     | 72,2   | 0,0      | 0,1   | 0,0      | 1,8   | 670,3   | 865,0  |                                       |        |      |
| 1534     | 2,1              | 1039,1 | 2,1     | 1014,1 | 1,4     | 406,3  | 0,7     | 470,8  | 0,0      | 0,4   | 0,0      | 23,0  | 1101,6  | 786,0  |                                       |        |      |
| 1539     | 0,5              | 260,9  | 0,4     | 256,1  | 0,1     | 135,3  | 0,2     | 109,3  | 0,0      | 0,0   | 0,0      | 2,8   | 510,3   | 2004,4 |                                       |        |      |
| 1542     | 12,5             | 289,6  | 12,5    | 282,8  | 8,8     | 174,9  | 3,5     | 99,1   | 0,0      | 0,2   | 0,0      | 4,4   | 1239,9  | 2861,7 |                                       |        |      |
| 1901     | 0,1              | 39,1   | 0,1     | 16,3   | 0,0     | 7,1    | 0,1     | 7,1    | 0,0      | 0,1   | 0,0      | 17,4  | 462,7   | 1184,8 |                                       |        |      |
| 1915     | 7,5              | 134,9  | 7,5     | 89,9   | 6,0     | 38,8   | 1,5     | 44,4   | 0,0      | 0,2   | 0,0      | 32,0  | 999,0   | 1774,1 |                                       |        |      |
| 2021     | 37,5             | 73,2   | 11,6    | 56,8   | 8,6     | 29,4   | 2,5     | 21,8   | 18,5     | 11,0  | 0,2      | 1,2   | 373,5   | 312,8  |                                       |        |      |
| 2039     | 13,2             | 97,2   | 0,6     | 94,2   | 0,3     | 33,8   | 0,1     | 44,7   | 10,6     | 0,4   | 0,1      | 1,8   | 553,4   | 418,4  |                                       |        |      |
| 2047     | 15,9             | 2065,4 | 9,6     | 2026,4 | 6,4     | 1197,6 | 2,1     | 723,4  | 1,8      | 0,0   | 0,9      | 32,2  | 301,3   | 1075,9 |                                       |        |      |
| 1930     | 16,8             | 64,7   | 6,5     | 23,1   | 5,4     | 17,6   | 0,9     | 3,6    | 7,4      | 29,7  | 0,3      | 5,3   | 342,3   | 1122,0 |                                       |        |      |
| 1931     | 50,8             | 164,6  | 29,7    | 117,9  | 22,3    | 81,3   | 6,3     | 31,8   | 14,1     | 35,6  | 2,2      | 7,1   | 547,8   | 764,7  |                                       |        |      |
| 1956     | 43,5             | 41,8   | 4,8     | 8,0    | 2,2     | 3,8    | 2,1     | 3,7    | 33,8     | 21,6  | 0,4      | 1,0   | 2004,9  | 10542  |                                       |        |      |
| 1958     | 36,9             | 44,8   | 10,1    | 19,7   | 7,3     | 13,4   | 2,2     | 5,0    | 22,4     | 19,9  | 0,8      | 2,3   | 1369,7  | 808,1  |                                       |        |      |
| 1959     | 50,0             | 127,2  | 12,8    | 45,8   | 9,2     | 32,7   | 2,5     | 10,8   | 29,3     | 54,7  | 3,7      | 20,1  | 657,2   | 812,5  |                                       |        |      |
| 1960     | 29,9             | 49,6   | 16,5    | 28,2   | 11,9    | 17,8   | 3,4     | 7,3    | 9,9      | 15,8  | 1,1      | 2,5   | 654,0   | 589,1  |                                       |        |      |
| 1961     | 60,8             | 139,2  | 36,4    | 121,3  | 19,8    | 65,3   | 14,6    | 48,6   | 14,6     | 7,3   | 5,2      | 10,1  | 287,3   | 95,6   |                                       |        |      |
| 1962     | 85,2             | 210,1  | 30,7    | 128,2  | 23,8    | 70,5   | 5,2     | 48,7   | 43,1     | 58,7  | 2,7      | 17,0  | 320,0   | 226,2  |                                       |        |      |
| 2071     | 43,7             | 43,3   | 42,8    | 42,4   | 0,1     | 13,8   | 39,6    | 26,4   | 0,0      | 0,0   | 0,1      | 0,1   | 3089,6  | 2544,1 |                                       |        |      |
| 2098     | 1,6              | 6,1    | 0,9     | 4,4    | 0,4     | 1,9    | 0,4     | 2,2    | 0,4      | 0,8   | 0,0      | 0,2   | 1153,0  | 1186,1 |                                       |        |      |
| 2099     | 0,9              | 15,3   | 0,9     | 14,8   | 0,9     | 10,4   | 0,0     | 4,1    | 0,0      | 0,0   | 0,0      | 0,1   | 1120,4  | 1237,4 |                                       |        |      |
| 2109     | 3,7              | 73,6   | 3,7     | 73,0   | 1,0     | 28,3   | 2,7     | 42,0   | 0,0      | 0,2   | 0,0      | 0,1   | 3764,3  | 5449,2 |                                       |        |      |
| 2149     | 102,4            | 288,0  | 32,2    | 204,6  | 16,0    | 105,7  | 15,3    | 88,7   | 57,7     | 63,6  | 1,3      | 7,5   | 702,7   | 690,1  |                                       |        |      |
| 2150     | 65,7             | 50,9   | 61,1    | 48,8   | 39,5    | 28,2   | 18,4    | 19,4   | 3,3      | 0,7   | 0,1      | 0,1   | 422,8   | 397,1  |                                       |        |      |
| 2154     | 258,6            | 199,6  | 176,1   | 179,2  | 90,3    | 149,9  | 82,1    | 26,7   | 73,3     | 16,6  | 1,2      | 0,5   | 986,5   | 768,7  |                                       |        |      |
| 2168     | 70,9             | 132,8  | 11,1    | 50,5   | 7,9     | 32,7   | 2,7     | 14,7   | 52,7     | 55,9  | 0,9      | 11,2  | 472,2   | 684,0  |                                       |        |      |
| 2169     | 31,6             | 37,5   | 30,8    | 37,0   | 18,6    | 20,6   | 11,3    | 14,7   | 0,2      | 0,1   | 0,1      | 0,1   | 528,0   | 797,8  |                                       |        |      |
| 2242     | 1,2              | 10,9   | 1,1     | 8,0    | 0,9     | 6,5    | 0,1     | 0,9    | 0,0      | 2,7   | 0,0      | 0,1   | 938,9   | 2610,6 |                                       |        |      |
| 2372     | 28,7             | 62,4   | 7,6     | 23,8   | 6,0     | 17,1   | 1,4     | 6,1    | 17,7     | 32,6  | 0,4      | 1,7   | 560,2   | 877,8  |                                       |        |      |
| 2381     | 211,7            | 305,5  | 3,8     | 54,2   | 1,2     | 34,4   | 2,5     | 11,0   | 191,6    | 201,5 | 1,4      | 29,5  | 1054,7  | 619,5  |                                       |        |      |
| 2373     | 51,2             | 1924,0 | 48,7    | 1906,8 | 30,2    | 1159,6 | 15,3    | 684,5  | 1,4      | 0,4   | 0,5      | 2,0   | 810,4   | 1742,6 |                                       |        |      |
| 2376     | 61,5             | 513,5  | 17,2    | 499,4  | 11,9    | 273,9  | 3,4     | 199,9  | 36,2     | 1,1   | 1,1      | 8,9   | 1263,2  | 542,6  |                                       |        |      |
| 2405     | 282,0            | 444,6  | 49,9    | 278,5  | 41,7    | 167,0  | 7,1     | 105,8  | 211,8    | 127,1 | 3,7      | 20,4  | 610,9   | 249,3  |                                       |        |      |
| 2410     | 55,2             | 146,0  | 54,1    | 143,0  | 41,1    | 35,8   | 8,6     | 101,6  | 0,9      | 0,0   | 0,0      | 0,2   | 1237,9  | 1215,2 |                                       |        |      |
| 2412     | 69,5             | 155,1  | 17,8    | 146,1  | 5,6     | 78,7   | 10,4    | 59,6   | 44,9     | 2,5   | 3,4      | 1,2   | 1307,0  | 963,7  |                                       |        |      |
| 2415     | 88,7             | 1101,7 | 81,3    | 1081,6 | 65,7    | 741,4  | 10,3    | 306,1  | 5,6      | 0,0   | 0,1      | 14,8  | 1907,1  | 607,1  |                                       |        |      |
| 2417     | 81,0             | 1762,5 | 9,5     | 1634,3 | 7,4     | 949,5  | 1,8     | 595,1  | 63,9     | 5,7   | 0,7      | 69,9  | 876,5   | 551,8  |                                       |        |      |
| 2418     | 159,1            | 4613,0 | 9,6     | 4093,2 | 7,0     | 2064,8 | 2,5     | 1769,1 | 136,3    | 29,8  | 0,5      | 338,3 | 1766,9  | 1445,9 |                                       |        |      |
| 2419     | 200,7            | 939,5  | 7,0     | 597,8  | 2,3     | 180,7  | 4,3     | 372,7  | 172,1    | 45,3  | 1,0      | 232,0 | 804,3   | 26,4   |                                       |        |      |
| 2422     | 79,3             | 1621,1 | 5,2     | 1489,8 | 2,5     | 892,5  | 2,6     | 476,9  | 70,5     | 3,2   | 0,7      | 91,0  | 1153,6  | 372,7  |                                       |        |      |
| 2424     | 52,1             | 238,4  | 19,2    | 176,6  | 13,8    | 73,2   | 5,2     | 85,3   | 30,4     | 44,3  | 0,7      | 14,4  | 1743,1  | 620,6  |                                       |        |      |
| 2425     | 32,6             | 301,6  | 5,4     | 281,9  | 3,4     | 95,4   | 1,3     | 157,8  | 24,9     | 5,6   | 0,2      | 8,7   | 882,2   | 949,5  |                                       |        |      |
| 2426     | 37,7             | 339,9  | 14,5    | 336,0  | 12,2    | 171,0  | 1,1     | 146,1  | 22,1     | 0,3   | 0,1      | 0,6   | 975,7   | 1846,7 |                                       |        |      |
| 2429     | 51,5             | 209,2  | 6,3     | 173,3  | 4,1     | 75,3   | 2,0     | 76,8   | 39,1     | 24,0  | 0,3      | 5,6   | 611,9   | 776,6  |                                       |        |      |
| 2431     | 91,2             | 787,3  | 23,6    | 755,1  | 10,5    | 244,8  | 9,6     | 462,9  | 58,5     | 4,4   | 1,2      | 14,1  | 1010,1  | 824,5  |                                       |        |      |
| 2433     | 285,0            | 384,4  | 6,7     | 246,8  | 1,0     | 75,0   | 2,8     | 138,3  | 262,1    | 75,5  | 2,2      | 49,7  | 722,5   | 94,5   |                                       |        |      |
| 2434     | 563,8            | 409,6  | 58,8    | 235,7  | 20,9    | 62,3   | 27,2    | 157,4  | 482,9    | 154,4 | 4,1      | 11,5  | 541,4   | 45,9   |                                       |        |      |
| 2435     | 60,8             | 322,2  | 5,4     | 263,0  | 3,1     | 64,7   | 2,0     | 182,5  | 50,2     | 49,2  | 0,4      | 6,0   | 1184,5  | 156,9  |                                       |        |      |
| 2436     | 35,8             | 230,0  | 2,9     | 221,1  | 1,6     | 53,9   | 1,0     | 128,7  | 29,9     | 3,5   | 0,2      | 1,7   | 1071,0  | 1344,2 |                                       |        |      |
| 2438     | 22,3             | 437,5  | 2,6     | 419,5  | 1,0     | 213,5  | 1,5     | 169,0  | 18,2     | 2,7   | 0,2      | 5,5   | 854,5   | 1775,7 |                                       |        |      |
| 2439     | 12,0             | 215,1  | 4,0     | 200,6  | 2,0     | 117,7  | 1,8     | 63,4   | 6,7      | 0,5   | 0,1      | 7,6   | 1854,1  | 993,7  |                                       |        |      |
| 2443     | 94,0             | 251,2  | 5,1     | 205,9  | 2,7     | 84,0   | 2,4     | 103,8  | 85,6     | 24,8  | 0,7      | 6,8   | 1361,4  | 841,0  |                                       |        |      |
| 2444     | 133,9            | 4899,2 | 44,0    | 4759,8 | 16,9    | 2260,5 | 16,9    | 2296,9 | 86,5     | 70,1  | 1,1      | 8,4   | 959,4   | 676,9  |                                       |        |      |
| 2551     | 118,1            | 172,1  | 7,4     | 78,1   | 4,3     | 52,1   | 2,9     | 20,2   | 104,8    | 71,7  | 1,1      | 15,8  | 914,2   | 672,9  |                                       |        |      |
| 2571     | 18,6             | 160,0  | 15,2    | 149,3  | 11,4    | 100,2  | 3,7     | 40,4   | 0,0      | 0,7   | 2,4      | 8,2   | 432,4   | 1202,3 |                                       |        |      |
| 2575     | 10,3             | 31,4   | 9,9     | 30,5   | 3,4     | 16,6   | 5,9     | 11,1   | 0,0      | 0,1   | 0,0      | 0,1   | 877,1   | 6681,7 |                                       |        |      |
| 2649     | 142,4            | 591,6  | 136,7   | 578,6  | 89,8    | 446,8  | 40,0    | 108,9  | 2,4      | 3,2   | 0,2      | 6,0   | 1077,0  | 1671,3 |                                       |        |      |

**Supplementary Table 2.** Leukocyte cell numbers in the blood of CD34 mice

| CD34 mice | N=42  | Number of cells/ $\mu$ l blood volume |      |         |      |         |       |         |       |          |     |          |        |          |  |
|-----------|-------|---------------------------------------|------|---------|------|---------|-------|---------|-------|----------|-----|----------|--------|----------|--|
|           |       |                                       |      | <10     |      | 10-100  |       | >100    |       |          |     |          |        |          |  |
|           |       | hu-CD45+                              |      | hu-CD3+ |      | hu-CD4+ |       | hu-CD8+ |       | hu-CD19+ |     | hu-CD16+ |        | mu-CD45+ |  |
| Mouse ID  | w0    | w2                                    | w0   | w2      | w0   | w2      | w0    | w2      | w0    | w2       | w0  | w2       | w0     | w2       |  |
| 1300      | 447,3 | 258,2                                 | 4,5  | 7,1     | 12,2 | 24,8    | 17,4  | 33,5    | 408,2 | 193,4    | nd  | nd       | 641,4  | 255,0    |  |
| 1306      | 493,7 | 235,6                                 | 6,6  | 6,9     | 14,2 | 10,6    | 23,3  | 18,5    | 456,9 | 209,5    | nd  | nd       | 524,2  | 195,2    |  |
| 1321      | 42,2  | 134,3                                 | 5,7  | 10,6    | 24,2 | 113,0   | 31,0  | 124,9   | 9,9   | 0,4      | nd  | nd       | 803,2  | 773,2    |  |
| 1337      | 4,2   | 3,9                                   | 0,5  | 0,1     | 0,8  | 0,8     | 1,5   | 0,9     | 1,7   | 0,9      | nd  | nd       | 2340,8 | 3357,8   |  |
| 1548      | 45,2  | 54,6                                  | 23,8 | 21,5    | 19,3 | 30,3    | 44,9  | 54,4    | 0,1   | 0,0      | nd  | nd       | 804,5  | 591,7    |  |
| 1576      | 60,7  | 86,5                                  | 4,7  | 6,7     | 14,1 | 30,0    | 19,4  | 37,3    | 33,9  | 38,2     | nd  | nd       | 899,1  | 694,7    |  |
| 1620      | 7,0   | 17,1                                  | 0,0  | 0,6     | 1,6  | 3,0     | 1,7   | 3,9     | 4,5   | 11,5     | nd  | nd       | 945,5  | 936,8    |  |
| 1802      | 26,8  | 64,9                                  | 2,4  | 2,3     | 2,6  | 4,5     | 5,4   | 7,7     | 16,3  | 49,9     | nd  | nd       | 485,3  | 619,3    |  |
| 1549      | 115,6 | 161,9                                 | 14,8 | 24,9    | 27,0 | 50,3    | 43,7  | 78,4    | 64,6  | 71,6     | nd  | nd       | 427,0  | 382,9    |  |
| 1617      | 21,3  | 9,8                                   | 2,2  | 1,1     | 15,5 | 6,7     | 18,9  | 8,6     | 1,0   | 0,7      | nd  | nd       | 1809,4 | 840,0    |  |
| 1619      | 0,3   | 0,6                                   | 0,1  | 0,3     | 0,1  | 0,2     | 0,3   | 0,6     | 0,0   | 0,0      | nd  | nd       | 1300,3 | 1041,1   |  |
| 1803      | 213,3 | 38,6                                  | 36,9 | 9,4     | 57,5 | 13,9    | 210,2 | 38,2    | 0,7   | 0,1      | nd  | nd       | 381,1  | 1096,2   |  |
| 1506      | 1,9   | 1,5                                   | 0,4  | 0,5     | 1,3  | 0,6     | 1,8   | 1,4     | 0,0   | 0,0      | 0,0 | 0,1      | 956,8  | 935,7    |  |
| 1535      | 18,8  | 0,3                                   | 0,3  | 0,1     | 0,2  | 0,1     | 0,7   | 0,3     | 15,1  | 0,0      | 0,1 | 0,0      | 466,9  | 338,9    |  |
| 1541      | 3,3   | 2,1                                   | 1,5  | 0,9     | 1,2  | 0,8     | 3,3   | 1,8     | 0,0   | 0,0      | 0,0 | 0,0      | 838,2  | 648,9    |  |
| 1996      | 14,2  | 18,4                                  | 1,9  | 1,6     | 1,5  | 2,7     | 3,7   | 4,8     | 7,8   | 10,6     | 0,0 | 0,0      | 510,1  | 636,7    |  |
| 2035      | 18,6  | 7,3                                   | 3,0  | 0,7     | 5,9  | 0,9     | 8,9   | 1,7     | 7,5   | 4,8      | 0,0 | 0,0      | 1004,8 | 547,8    |  |
| 2040      | 23,2  | 15,2                                  | 0,4  | 2,7     | 13,4 | 11,1    | 14,7  | 14,6    | 7,6   | 0,5      | 0,1 | 0,1      | 247,8  | 695,7    |  |
| 2044      | 1,7   | 2,4                                   | 0,1  | 0,2     | 0,3  | 0,2     | 0,4   | 0,5     | 0,9   | 1,0      | 0,0 | 0,1      | 544,6  | 1150,6   |  |
| 2048      | 5,6   | 2,2                                   | 1,9  | 0,7     | 3,5  | 1,2     | 5,6   | 2,1     | 0,0   | 0,0      | 0,0 | 0,1      | 875,3  | 1518,0   |  |
| 2049      | 74,9  | 20,0                                  | 4,4  | 2,8     | 63,8 | 16,1    | 74,5  | 19,7    | 0,1   | 0,0      | 0,1 | 0,1      | 617,4  | 1724,6   |  |
| 2050      | 17,3  | 47,0                                  | 0,1  | 0,5     | 2,6  | 19,3    | 3,2   | 20,4    | 8,3   | 19,1     | 0,6 | 1,2      | 274,4  | 164,9    |  |
| 1929      | 78,5  | 120,0                                 | 10,2 | 10,6    | 16,6 | 32,7    | 29,0  | 45,3    | 37,3  | 63,8     | 1,6 | 5,2      | 400,2  | 416,9    |  |
| 1964      | 91,6  | 115,3                                 | 9,4  | 12,8    | 28,7 | 27,1    | 40,3  | 42,8    | 33,3  | 54,5     | 8,4 | 8,5      | 480,0  | 477,4    |  |
| 2070      | 23,0  | 16,8                                  | 0,2  | 0,0     | 22,6 | 16,4    | 22,9  | 16,5    | 0,0   | 0,0      | 0,0 | 0,0      | 1043,7 | 1917,9   |  |
| 2151      | 86,8  | 266,9                                 | 26,0 | 104,0   | 34,9 | 99,0    | 65,5  | 217,6   | 8,5   | 21,4     | 1,8 | 10,5     | 617,1  | 789,3    |  |
| 2156      | 12,1  | 11,0                                  | 3,2  | 3,8     | 8,4  | 6,3     | 12,1  | 10,8    | 0,0   | 0,1      | 0,0 | 0,1      | 983,1  | 814,6    |  |
| 2171      | 47,8  | 89,2                                  | 10,0 | 22,4    | 9,3  | 27,2    | 19,7  | 51,6    | 21,2  | 21,2     | 0,6 | 3,2      | 215,4  | 261,1    |  |
| 2371      | 54,6  | 60,6                                  | 2,2  | 2,1     | 3,4  | 3,6     | 6,3   | 5,9     | 42,7  | 48,8     | 0,3 | 0,3      | 1123,7 | 852,4    |  |
| 2382      | 115,0 | 112,9                                 | 5,1  | 7,6     | 2,9  | 5,9     | 9,2   | 14,6    | 90,6  | 80,0     | 1,4 | 2,3      | 612,7  | 473,3    |  |
| 2375      | 158,3 | 133,2                                 | 1,5  | 1,8     | 15,1 | 7,6     | 17,6  | 10,4    | 127,6 | 110,0    | 2,0 | 2,0      | 1263,5 | 742,7    |  |
| 2378      | 513,2 | 340,8                                 | 1,4  | 0,8     | 8,0  | 5,0     | 9,8   | 6,5     | 468,2 | 311,6    | 5,8 | 6,9      | 521,0  | 329,6    |  |
| 2397      | 297,6 | 308,7                                 | 3,9  | 3,9     | 3,7  | 6,0     | 9,0   | 11,2    | 264,7 | 272,6    | 1,7 | 4,5      | 864,1  | 858,5    |  |
| 2398      | 132,0 | 208,5                                 | 3,1  | 3,0     | 5,8  | 13,3    | 10,3  | 17,5    | 111,6 | 171,7    | 0,6 | 3,8      | 1215,0 | 876,2    |  |
| 2400      | 247,1 | 284,7                                 | 4,2  | 2,2     | 4,1  | 15,7    | 9,4   | 19,4    | 213,9 | 237,1    | 2,0 | 4,5      | 1180,1 | 693,8    |  |
| 2421      | 50,4  | 26,8                                  | 10,4 | 11,4    | 8,5  | 9,5     | 21,1  | 22,9    | 26,2  | 2,0      | 1,2 | 0,1      | 695,1  | 1313,5   |  |
| 2430      | 70,4  | 72,1                                  | 7,8  | 4,1     | 5,9  | 6,4     | 13,7  | 10,9    | 50,8  | 53,0     | 0,3 | 1,0      | 610,8  | 986,5    |  |
| 2442      | 234,5 | 33,9                                  | 11,1 | 6,6     | 14,8 | 10,0    | 27,0  | 18,8    | 189,3 | 13,3     | 1,4 | 0,3      | 739,4  | 1138,2   |  |
| 2549      | 47,4  | 31,2                                  | 2,0  | 2,1     | 11,2 | 10,1    | 13,6  | 12,2    | 29,6  | 17,8     | 0,3 | 0,1      | 556,2  | 660,9    |  |
| 2550      | 84,7  | 84,6                                  | 0,3  | 1,0     | 0,6  | 0,4     | 1,2   | 1,8     | 78,6  | 79,1     | 0,9 | 1,0      | 1022,1 | 665,6    |  |
| 2573      | 3,9   | 4,5                                   | 1,7  | 2,2     | 1,0  | 1,5     | 2,8   | 4,3     | 0,6   | 0,0      | 0,0 | 0,0      | 1083,7 | 1105,9   |  |
| 2647      | 22,4  | 18,2                                  | 8,3  | 5,2     | 10,3 | 10,4    | 20,2  | 16,5    | 1,2   | 1,0      | 0,2 | 0,1      | 1433,4 | 501,7    |  |



**Supplementary Table 3. Leukocyte cell numbers in tissue of CD34T+ and CD34 mice**

| Model  | Mouse ID | No. of cells/ 10 <sup>6</sup> cells in lamina propria at w2 |         |         |          |          |
|--------|----------|-------------------------------------------------------------|---------|---------|----------|----------|
|        |          | hu-CD3+                                                     | hu-CD4+ | hu-CD8+ | hu-CD19+ | mu-CD45+ |
| CD34   | 1306     | 267.6                                                       | 14.4    | 34.5    | 141.0    | 12975.0  |
| CD34   | 1321     | 688.6                                                       | 468.6   | 131.5   | 145.8    | 4915.8   |
| CD34   | 1300     | 70.0                                                        | 4.7     | 0.0     | 39.7     | 4167.8   |
| CD34   | 1337     | 99.3                                                        | 2.2     | 11.0    | 17.7     | 24507.5  |
| CD34   | 1576     | 171.0                                                       | 61.4    | 13.2    | 67.9     | 26189.6  |
| CD34   | 1802     | 77.3                                                        | 15.0    | 8.6     | 27.9     | 23331.0  |
| CD34   | 1548     | 70.3                                                        | 33.0    | 4.4     | 2.2      | 35584.3  |
| CD34   | 1620     | 18.3                                                        | 0.0     | 2.3     | 29.8     | 14469.8  |
| CD34   | 2371     | 159.4                                                       | 8.3     | 0.0     | 22.8     | 41694.4  |
| CD34   | 2382     | 66.8                                                        | 8.3     | 0.0     | 41.7     | 13228.6  |
| CD34T+ | 1344     | 2003.4                                                      | 1343.6  | 260.0   | 91.8     | 14545.6  |
| CD34T+ | 1317     | 868.3                                                       | 477.4   | 126.2   | 131.1    | 7876.1   |
| CD34T+ | 1320     | 20039.9                                                     | 13773.5 | 3346.8  | 453.1    | 68751.0  |
| CD34T+ | 1550     | 5709.2                                                      | 2911.0  | 1937.1  | 60.7     | 21496.3  |
| CD34T+ | 1800     | 9681.3                                                      | 4027.8  | 3662.0  | 27.8     | 17683.4  |
| CD34T+ | 1571     | 1099.5                                                      | 675.1   | 109.9   | 88.0     | 27717.9  |
| CD34T+ | 1618     | 83.9                                                        | 2.2     | 11.0    | 8.8      | 16987.1  |
| CD34T+ | 2372     | 135.7                                                       | 63.7    | 8.2     | 0.0      | 28134.8  |
| CD34T+ | 2381     | 151.8                                                       | 18.7    | 6.2     | 41.6     | 13640.2  |

| Model  | Mouse ID | No. of cells/ 10 <sup>6</sup> cells in intra-epithelium at w2 |         |         |          |          |
|--------|----------|---------------------------------------------------------------|---------|---------|----------|----------|
|        |          | hu-CD3+                                                       | hu-CD4+ | hu-CD8+ | hu-CD19+ | mu-CD45+ |
| CD34   | 1306     | 330.6                                                         | 3.0     | 33.4    | 48.5     | 1052.5   |
| CD34   | 1321     | 250.5                                                         | 17.6    | 7.1     | 31.7     | 1710.9   |
| CD34   | 1300     | 192.0                                                         | 0.0     | 15.6    | 131.7    | 1049.5   |
| CD34   | 1337     | 372.1                                                         | 0.0     | 29.3    | 69.9     | 4124.7   |
| CD34   | 1576     | 495.3                                                         | 0.0     | 47.0    | 34.2     | 602.0    |
| CD34   | 1802     | 296.8                                                         | 0.0     | 17.2    | 38.7     | 600.0    |
| CD34   | 1548     | 293.1                                                         | 0.0     | 19.3    | 12.8     | 1320.2   |
| CD34   | 1620     | 186.0                                                         | 0.0     | 17.1    | 10.7     | 1490.0   |
| CD34   | 2371     | 386.3                                                         | 0.0     | 0.0     | 23.3     | 1001.9   |
| CD34   | 2382     | 307.2                                                         | 0.0     | 0.0     | 8.1      | 767.9    |
| CD34T+ | 1344     | 271.1                                                         | 42.9    | 54.2    | 49.9     | 368.7    |
| CD34T+ | 1317     | 1249.4                                                        | 286.5   | 217.0   | 35.8     | 1727.7   |
| CD34T+ | 1320     | 3835.9                                                        | 1390.1  | 1419.7  | 97.3     | 9749.5   |
| CD34T+ | 1550     | 341.0                                                         | 28.2    | 50.0    | 50.0     | 480.0    |
| CD34T+ | 1800     | 813.0                                                         | 108.0   | 489.1   | 14.8     | 2536.5   |
| CD34T+ | 1571     | 403.7                                                         | 17.2    | 10.7    | 19.3     | 1140.2   |
| CD34T+ | 1618     | 244.8                                                         | 2.2     | 15.2    | 17.3     | 1148.0   |
| CD34T+ | 2372     | 490.0                                                         | 10.4    | 0.0     | 12.5     | 942.4    |
| CD34T+ | 2381     | 739.6                                                         | 13.8    | 4.0     | 7.9      | 765.3    |

| Model  | Mouse ID | No. of cells/ 10 <sup>6</sup> cells in spleen at w2 |          |          |          |          |
|--------|----------|-----------------------------------------------------|----------|----------|----------|----------|
|        |          | hu-CD3+                                             | hu-CD4+  | hu-CD8+  | hu-CD19+ | mu-CD45+ |
| CD34   | 1306     | 17114.5                                             | 7374.7   | 8082.3   | 161409.3 | 71989.1  |
| CD34   | 1321     | 37657.2                                             | 31768.0  | 4971.5   | 6183.5   | 196772.1 |
| CD34   | 1300     | 37727.8                                             | 23376.3  | 11706.6  | 443152.9 | 51384.4  |
| CD34   | 1337     | 14563.5                                             | 12353.1  | 109.0    | 9113.9   | 588010.9 |
| CD34   | 1576     | 30366.1                                             | 23547.6  | 5864.8   | 62731.9  | 251566.1 |
| CD34   | 1802     | 16274.3                                             | 9329.9   | 5225.0   | 175796.5 | 399541.0 |
| CD34   | 1548     | 67005.2                                             | 30973.4  | 23273.6  | 1525.3   | 145455.2 |
| CD34   | 1620     | 31461.8                                             | 28440.5  | 555.1    | 71886.5  | 199539.6 |
| CD34   | 2371     | 3950.1                                              | 1743.0   | 2049.7   | 94541.7  | 64010.2  |
| CD34   | 2382     | 11367.4                                             | 4194.6   | 6204.8   | 187007.0 | 51005.0  |
| CD34T+ | 1344     | 484012.0                                            | 205888.7 | 175039.3 | 210726.7 | 10652.7  |
| CD34T+ | 1317     | 616356.2                                            | 289125.8 | 246492.7 | 34099.6  | 181182.1 |
| CD34T+ | 1320     | 305262.1                                            | 120994.2 | 145051.5 | 417.8    | 131654.6 |
| CD34T+ | 1550     | 285604.5                                            | 96094.8  | 157161.2 | 43804.5  | 55971.5  |
| CD34T+ | 1800     | 90674.1                                             | 22217.6  | 49175.3  | 9393.8   | 2396.4   |
| CD34T+ | 1571     | 169227.4                                            | 126501.9 | 37091.7  | 16658.4  | 224019.2 |
| CD34T+ | 1618     | 35639.5                                             | 15070.2  | 16173.8  | 4.2      | 380874.6 |
| CD34T+ | 2372     | 22477.2                                             | 14118.3  | 7700.5   | 55236.5  | 43175.4  |
| CD34T+ | 2381     | 21337.2                                             | 11751.2  | 5853.4   | 236240.1 | 40745.5  |
